# Supplementary material
Source: Springer Nature journal article supplement (https://www.springermedizin.de/resource/supplementary/12959_2014_209_MOESM2_ESM.pdf/9569284)

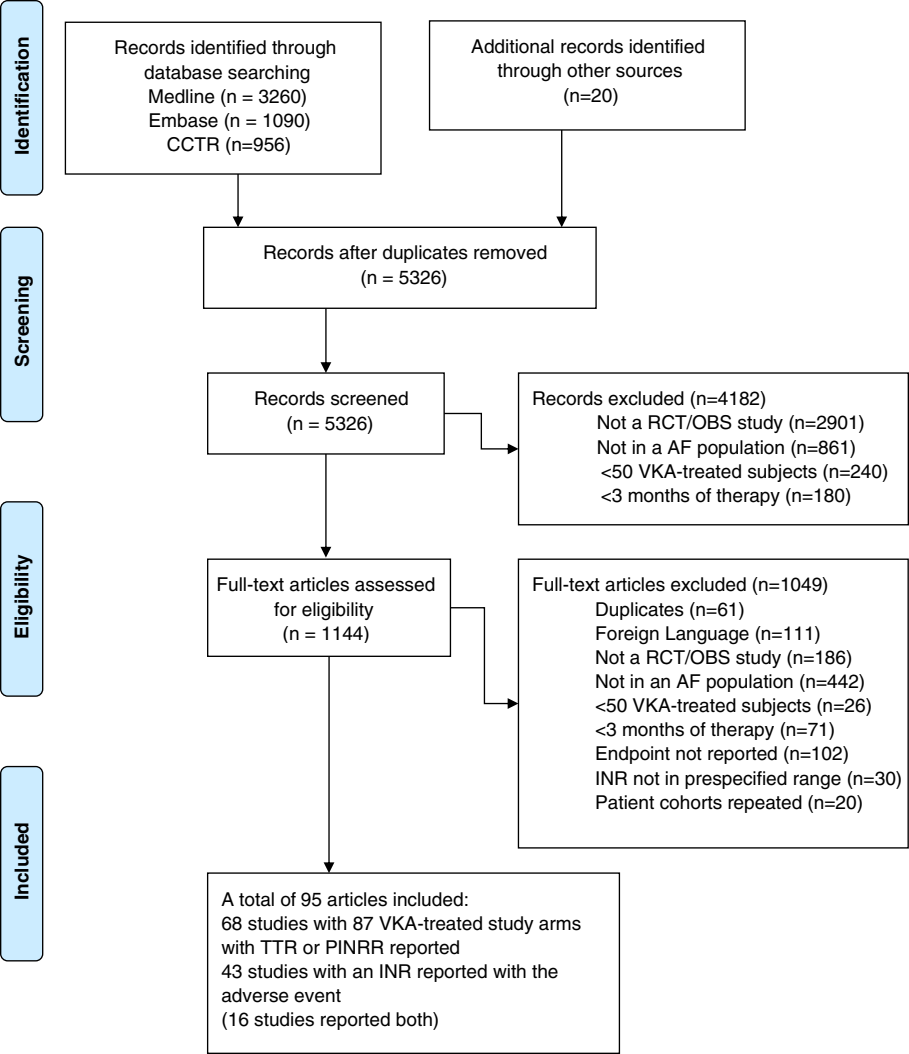

Supplement: MOESM2 [file 9569284]
